# Supplementary material for: Vertical Variation of Nonpoint Source Pollutants in the Three Gorges Reservoir Region
Source: PLoS One. 2013 Aug 12;8(8):e71194. doi: 10.1371/journal.pone.0071194 (PMC3741353; doi:10.1371/journal.pone.0071194)
Supplement: Methods S2 — The description of Small-scale watershed extended method (SWEM). (DOC) [file pone.0071194.s003.doc]

**Methods S2: The description of Small-scale watershed extended method (SWEM)**

To compensate for data shortage, we introduced a SWEM in part of the TGRR, and further extended this SWEM to the entire TGRR [1]. The basic idea of the SWEM is that the parameter groups of several typical catchments among a large watershed can be extended to the surrounding areas until the NPS pollution loads in the whole watershed can be obtained. The detailed processes involve: 1) model calibration- a process of estimating model parameter groups in the watersheds of the Yulin, Xiaojiang, Daning and Xiangxi to generate parameter groups for representing different parts of the TGRR [1-3]; 2) extended modeling- running the well-calibrated models in the corresponding parts of the TGRR. The Sequential Uncertainty Fitting version 2, which is incorporated into SWAT-CUP [4], was adopted for parameter calibration and validation. The Nash-Sutcliffe efficiency coefficient (*ENS*) was used to quantify the degree of fit between the measured data and the simulated data.

(1)

Where, is the ith observation for the constituent being evaluated, is the predicted value for the constituent being evaluated, is the mean value of observed data for the constituent being evaluated, and n is the total number of observations.

**Reference**

1. Hong, Q.; Sun, Z.; Chen, L.; Liu, R.; Shen, Z., Small-scale watershed extended method for non-point source pollution estimation in part of the Three Gorges Reservoir Region. *Int. J. Environ. Sci. Tech.* **2012,** *9*, (4), 595-604; DOI:10.1007/s13762-012-0094-y.
2. Shen, Z.; Chen, L.; Liao, Q.; Liu, R.; Hong, Q., Impact of spatial rainfall variability on hydrology and nonpoint source pollution modeling. *J. Hydrol.* **2012,** *472-473*, 205-215; DOI:10.1016/j.jhydrol.2012.09.019.
3. Ouyang, W.; Hao, F. H.; Wang, X. L.; Cheng, H. G., Nonpoint source pollution responses simulation for conversion cropland to forest in mountains by SWAT in China. *Environ. Manage.* **2008,** *41*, (1), 79-89.
4. Abbaspour, K. C. SWAT-CUP2: SWAT calibration and uncertainty programs - a user manual; Department of Systems Analysis, Integrated Assessment and Modelling (SIAM), Eawag, Swiss Federal Institute of Aquatic Science and Technology: Duebendorf, 2008.
